# Supplementary material for: MXene-regulation polyamide membrane featuring with bubble-like nodule for efficient dye/salt separation and antifouling performance
Source: Royal Society of Chemistry journal article supplement (doi:10.1039/d2ra00335j), 2022-01-01
Supplement: d2ra00335j1.pdf [file d2ra00335j1.pdf]

## Supporting information

### **MXene-regulation polyamide membrane featuring with bubble-like nodule for efficient dye/salt separation and antifouling performance**

Yuanyuan Wang<sup>a</sup>, Hang Xu<sup>a,\*</sup>, Mingmei Ding<sup>a</sup>, Lei Zhang<sup>b</sup>, Gang Chen<sup>c</sup>, Jiawei Fu<sup>a</sup>, Ao Wang<sup>a</sup>,

Jiapei Chen<sup>a</sup>, Bonan Liu<sup>a</sup>, Wen Yang<sup>a</sup>

<sup>a</sup> Key Laboratory of Integrated Regulation and Resource Development on Shallow Lakes, Ministry of Education, College of Environment, Hohai University, Nanjing 210098, China

<sup>b</sup> College of Civil and Architecture Engineering, Chuzhou University, Chuzhou 239000, China

<sup>c</sup> State Key Laboratory of Hydrology-Water Resources and Hydraulic Engineering, College of Hydrology and Water Resources, Hohai University, Nanjing 210098, China

\*Corresponding author: xuhang810826@163.com (Hang Xu)

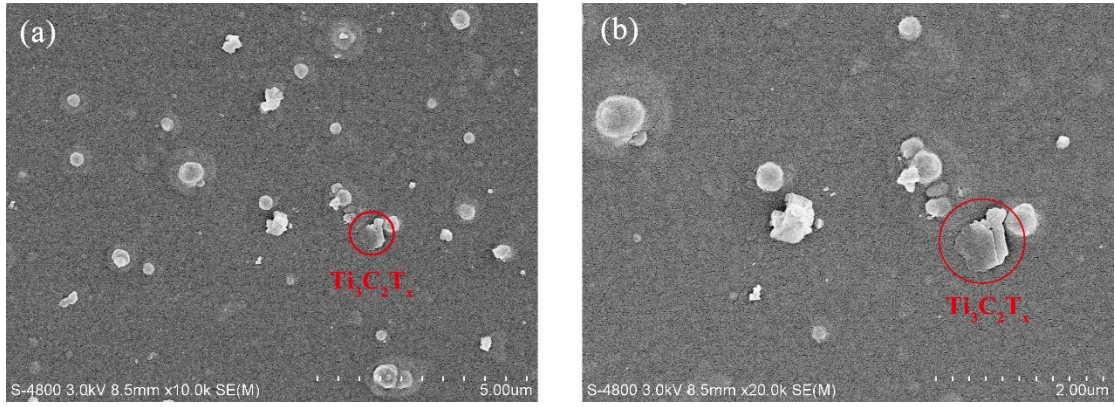

**Fig. S1** Surface SEM images of Ti<sub>3</sub>C<sub>2</sub>T<sub>x</sub>/NF membrane (M2), (a) low magnification, (b) high magnification

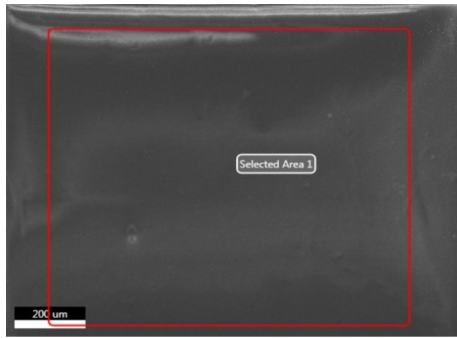

| Element | Weight (%) | Atomic (%) |
|---------|------------|------------|
| C K     | 50.99      | 56.91      |
| N K     | 21.40      | 20.48      |
| O K     | 24.02      | 20.13      |
| F K     | 3.47       | 2.45       |
| Ti K    | 0.12       | 0.03       |
| Totals  | 100        |            |

**Fig. S2 The EDS image of Ti<sub>3</sub>C<sub>2</sub>T<sub>x</sub>/NF membrane (M4).**

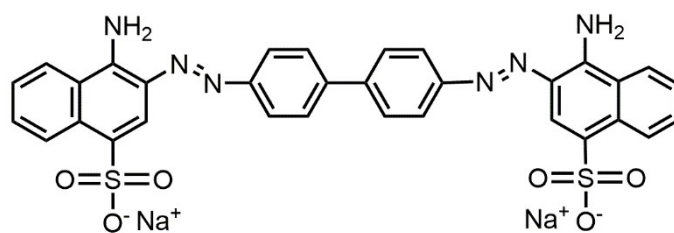

Congo Red (CR) 696.66 Da

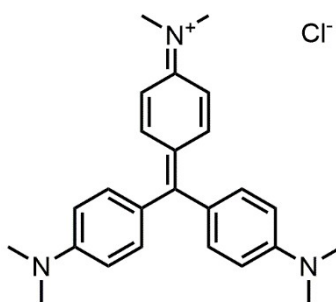

Crystal Violet (CV) 407.99 Da

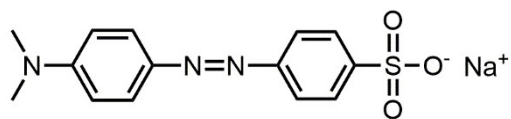

Methyl Orange (MO) 327.33 Da

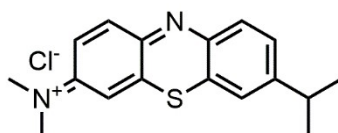

Methylene Blue (MB) 319.85 Da

**Fig. S3 Molecular structures of the model dyes in this study.**

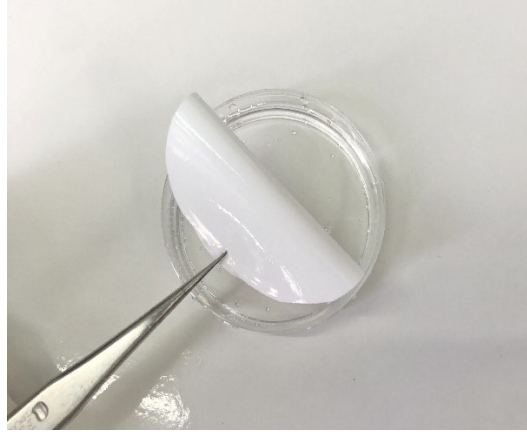

**Fig.S4** Digital photo of membrane **(M2)** after immersing into 2000 ppm  $\text{Na}_2\text{SO}_4$  solution for 24h

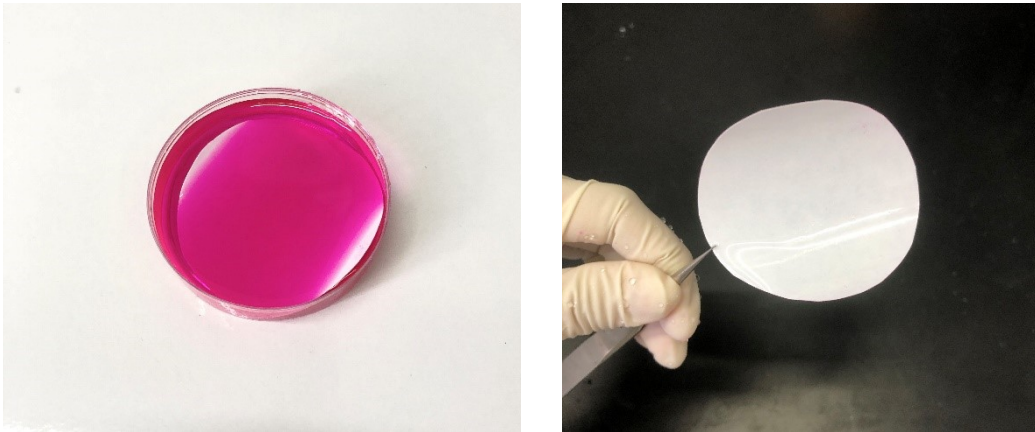

**Fig.S5** Digital photo of membrane **(M2)** after immersing into 100 ppm dye solution for 24h (a) and backwashing with DI water (b)

**Table S1.** Comparison of NaCl/dye filtration performances with other reported study.

| Membranes                                                        | Permeability<br>( $\text{Lm}^{-2}\text{h}^{-1}\text{bar}^{-1}$ ) | Type of<br>dyes (dyes<br>content)   | Dye<br>rejection<br>(%) | NaCl rejection<br>(%)<br>(Salt content) | Operating<br>pressure (MPa) | $\alpha^a$ | Ref.         |
|------------------------------------------------------------------|------------------------------------------------------------------|-------------------------------------|-------------------------|-----------------------------------------|-----------------------------|------------|--------------|
| PES-CNT-PA nanofiltration<br>membrane                            | ~17.2                                                            | Methyl<br>Violet<br>(0.1 g/L)       | 99.4                    | 24.7<br>(2 g/L)                         | 0.5                         | 123.5      | 64           |
| Catechin-chitosan loose NF<br>membrane                           | ~33.2                                                            | Crystal<br>Violet<br>(0.1 g/L)      | 98.5                    | 12.5<br>(1 g/L)                         | 0.2                         | 58.3       | 60           |
| SPECMs M-4                                                       | ~6.7                                                             | Methyl Blue<br>(0.1 g/L)            | 99.9                    | 15.8<br>(1 g/L)                         | 0.6                         | 850        | 22           |
| Sepro NF 2A membrane                                             | ~10.2                                                            | Rhodanile<br>Blue<br>(0.1 g/L)      | 98.6                    | 17.2<br>(2 g/L)                         | 0.6                         | 59.1       | 63           |
| Cross-linked PAN/Boltorn<br>membrane                             | ~11.0                                                            | Methyl Blue<br>(0.1 g/L)            | 97.5                    | 10.6<br>(2 g/L)                         | 0.5                         | 35.8       | 65           |
| PEA-TMC nanofiltration<br>membrane                               | ~16.6                                                            | Methyl Blue<br>(0.1 g/L)            | 95.4                    | 16.4<br>(1 g/L)                         | 0.4                         | 18.2       | 61           |
| PA/TpPa-12/PAN TFNC<br>membrane                                  | ~22                                                              | Acid<br>Fuchsin<br>(0.1 g/L)        | 99.8                    | 19.5<br>(2 g/L)                         | 0.5                         | 402.5      | 62           |
| TiO <sub>2</sub> -COOH/CaAlg hydrogel<br>nanofiltration membrane | ~14.1                                                            | Brilliant<br>Blue G250<br>(0.1 g/L) | 96.1                    | 7.5<br>(1 g/L)                          | 0.1                         | 23.7       | 59           |
| Ti <sub>3</sub> C <sub>2</sub> T <sub>x</sub> /NF membrane       | 12.9                                                             | Crystal<br>Violet<br>(0.1 g/L)      | 99.91                   | 26.16<br>(2 g/L)                        | 0.35                        | 820        | This<br>work |
|                                                                  | 12.4                                                             | Congo Red<br>(0.1 g/L)              | 99.86                   | 29.92<br>(2 g/L)                        | 0.35                        | 501        | This<br>work |

<sup>a</sup>  $\alpha$  denotes the selectivity of dye to NaCl, calculated by  $\alpha = (1 - R_{\text{NaCl}})/(1 - R_{\text{dye}})$ .
